# Supplementary material
Source: Springer Nature journal article supplement (https://www.springermedizin.de/resource/supplementary/12890_2009_232_MOESM2_ESM.pdf/9504760)
Supplement: MOESM2 [file 9504760]

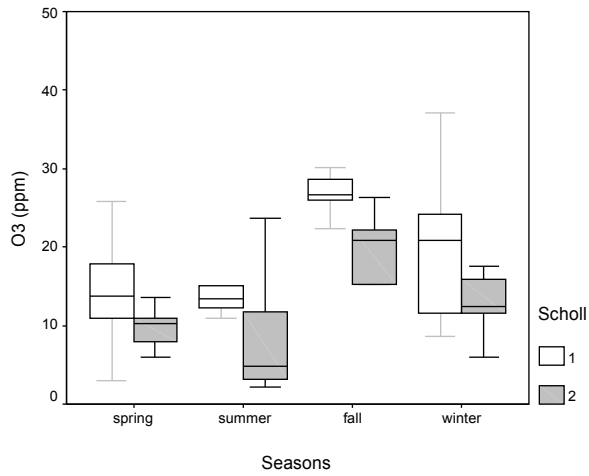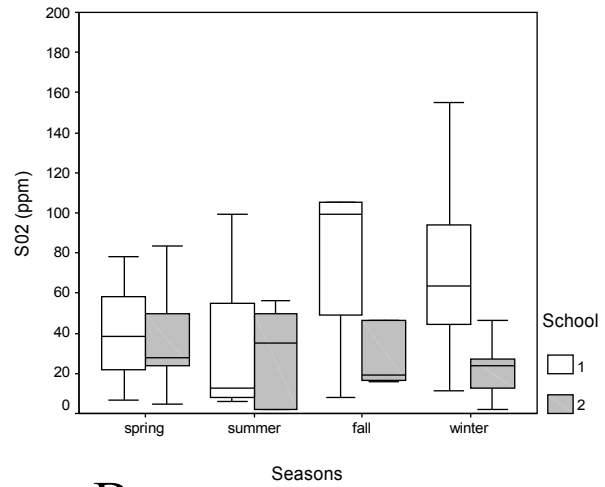

A

B

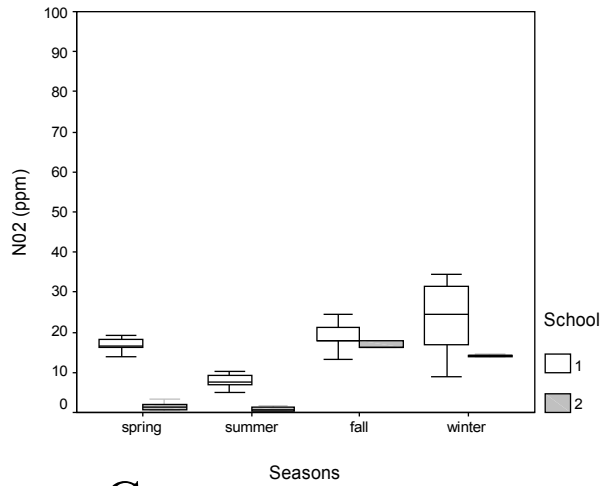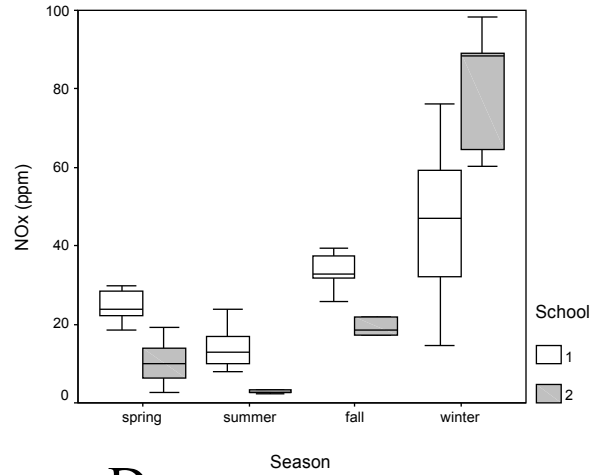

C

D

Fig 2. Levels of contaminants in the studied zones: A) O<sub>3</sub>, B) SO<sub>2</sub>, C) NO<sub>2</sub>, D) NO<sub>x</sub>. Expressed in parts per million (ppm).
